# Supplementary material for: Impact of HIV and chronic kidney disease comorbidities on hepatitis C treatment choices, drug–drug interactions and hepatitis C cure
Source: PubMed Central journal article supplement (PMC7192872; doi:10.1007/s11096-020-00994-6), 2020-02-25
Supplement: 11096_2020_994_MOESM1_ESM.pdf [file 11096_2020_994_MOESM1_ESM.pdf]

**Supplementary file: Genotypes and relevant frequency of treatment choices**

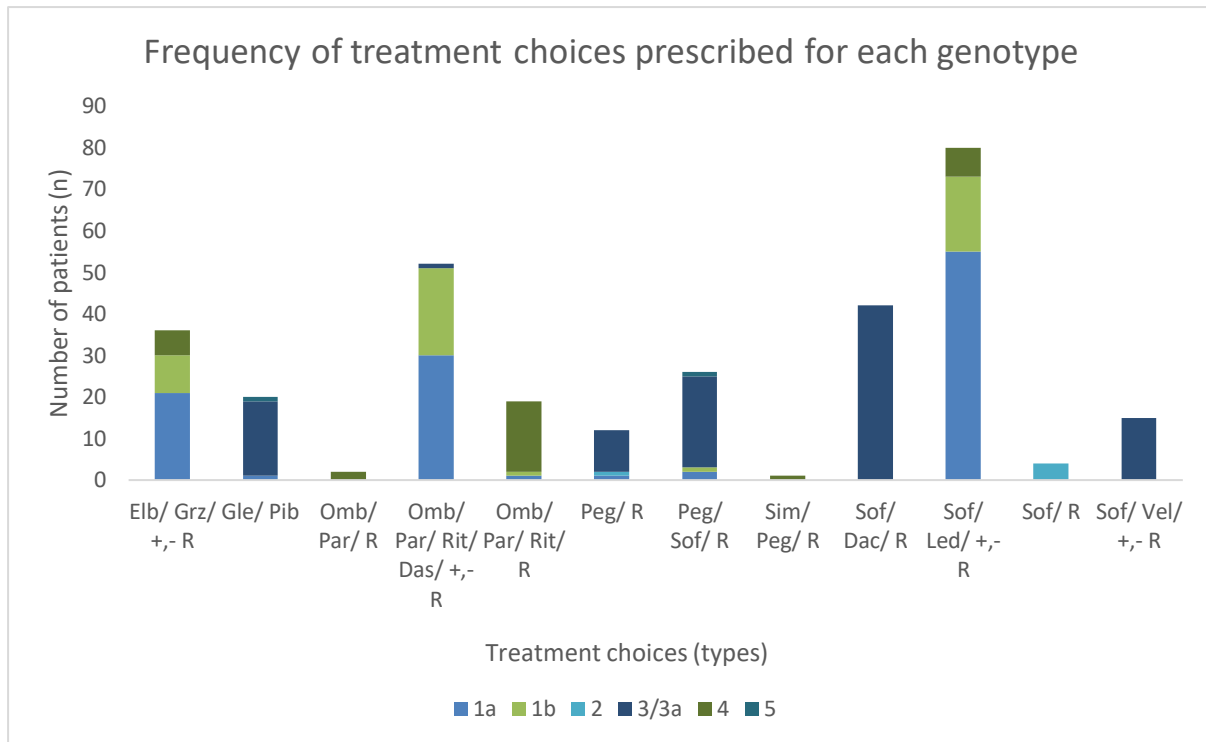

Abbreviations: Elb= Elbasvir/ Griseprvir, Sof/ Led= Sofosbuvir / Ledipasvir, Gle/ Pib= Glecaprevir/ pibrentasvir, Omb/ Par/ Rit/ Das= Ombitasvir/paritaprevir/ritonavir/ dasabuvir, R= ribavirin, Peg= pegylated interferon, Sim= simprevir, Led= Ledipasvir, Vel= velpatasvir
